# Supplementary material for: Multivalent GU-rich oligonucleotides sequester TDP-43 in the nucleus by inducing high molecular weight RNP complexes
Source: PubMed Central journal article supplement — iScience. 2024 May 24;27(6):110109. doi: 10.1016/j.isci.2024.110109 (PMC11233918; doi:10.1016/j.isci.2024.110109), 2024-05-24
Supplement: mmc1.pdf [file mmc1.pdf]

iScience, Volume 27

## **Supplemental information**

**Multivalent GU-rich oligonucleotides sequester**

**TDP-43 in the nucleus**

**by inducing high molecular weight RNP complexes**

**Xi Zhang, Tanuza Das, Tiffany F. Chao, Vickie Trinh, Rogger P. Carmen-Orozco, Jonathan P. Ling, Petr Kalab, and Lindsey R. Hayes**

# Figure S1

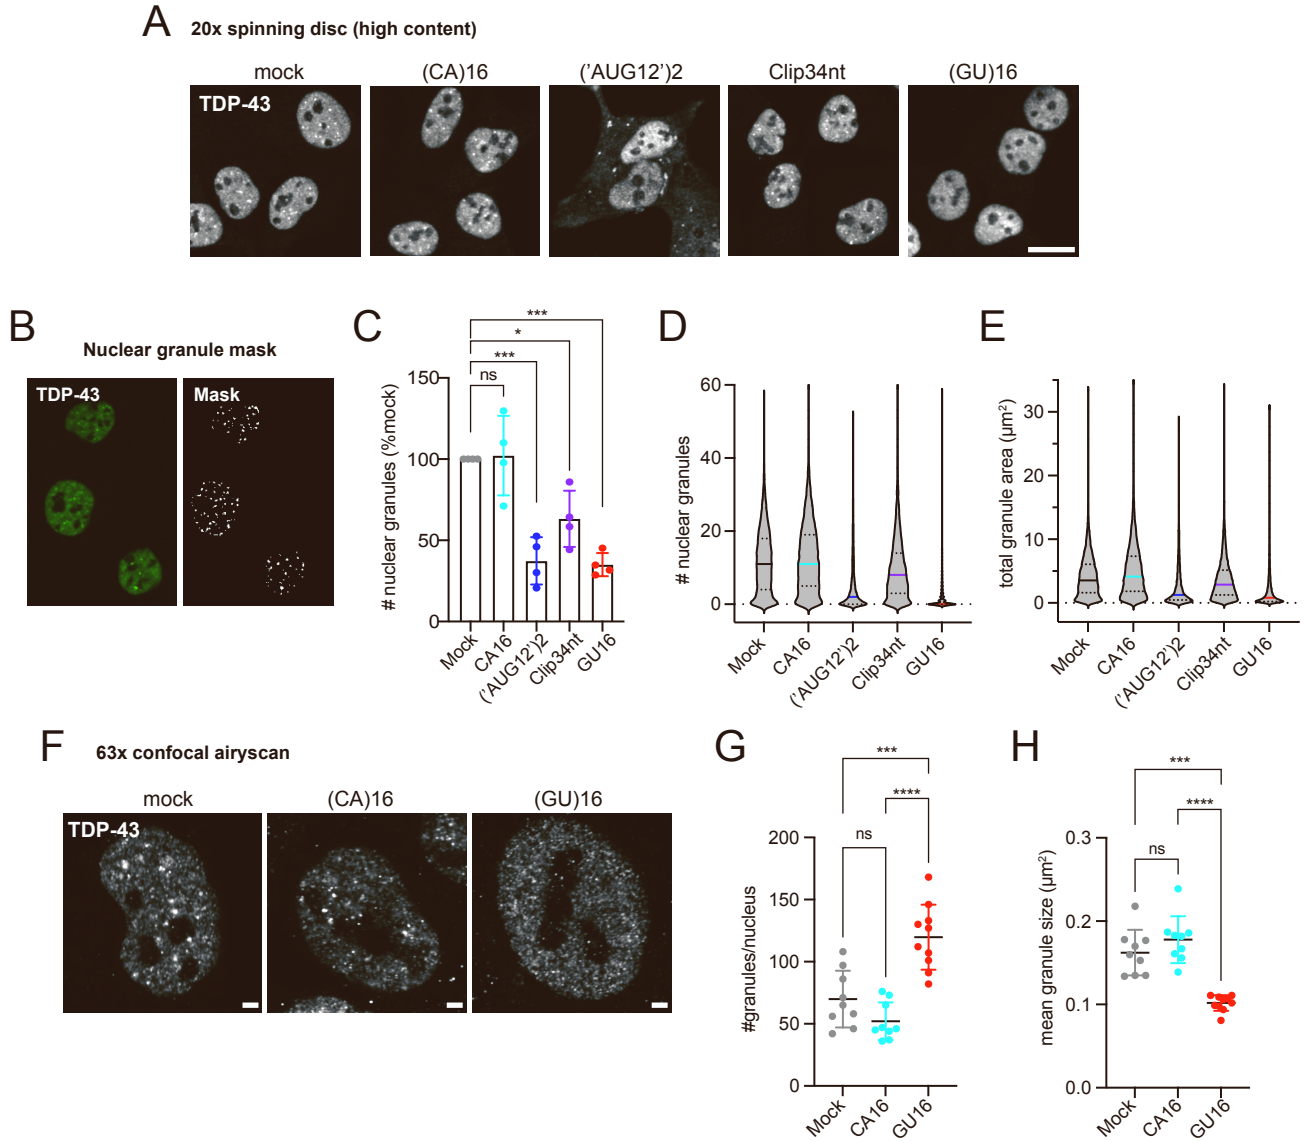

**Figure S1. GU-oligonucleotide transfection alters nuclear TDP-43 granule morphology, related to figure 2.** Oligo-transfected U2OS cells (125 nM, 24 h) were fixed and immunostained for TDP-43, and imaging/analysis of nuclear granule morphology was performed with 20x spinning disc high content microscope utilizing MetaXpress (**A-E**) or 63x confocal airyscan utilizing Image J (**F-H**). **A**. Representative 20x images. Scale bar = 20  $\mu\text{m}$ . **B**. Representative nuclear granule mask generated with custom MetaXpress analysis module (lower limit 0.5  $\mu\text{m}$ ). **C**. Number of nuclear TDP-43 granules expressed as % mock-transfected cells. Mean  $\pm$  SD of N=4 biological replicates. NS = not significant, \* $p < 0.05$ , \*\*\* $p < 0.001$  by one-way ANOVA with Tukey's post-hoc test. **D-E**. Violin plots of granule number (**D**) and total area/cell (**E**) from a representative replicate within **C** ( $n \sim 4,000$ -12,000 cells per condition). Median, 25<sup>th</sup>, and 75<sup>th</sup> percentiles are indicated. **F**. Representative 63x confocal airyscan images. Scale bar = 2  $\mu\text{m}$ . **G**. Mean number of TDP-43 granules/nucleus quantified by Image J 'analyze particles' function (lower limit 0.035  $\mu\text{m}$ ). **H**. Mean TDP-43 granule size ( $\mu\text{m}$ ). In G-H, N=9-10 cells/group. NS = not significant, \*\*\* $p < 0.001$ , \*\*\*\* $p < 0.0001$  by one-way ANOVA with Tukey's post-hoc test.

Figure S2

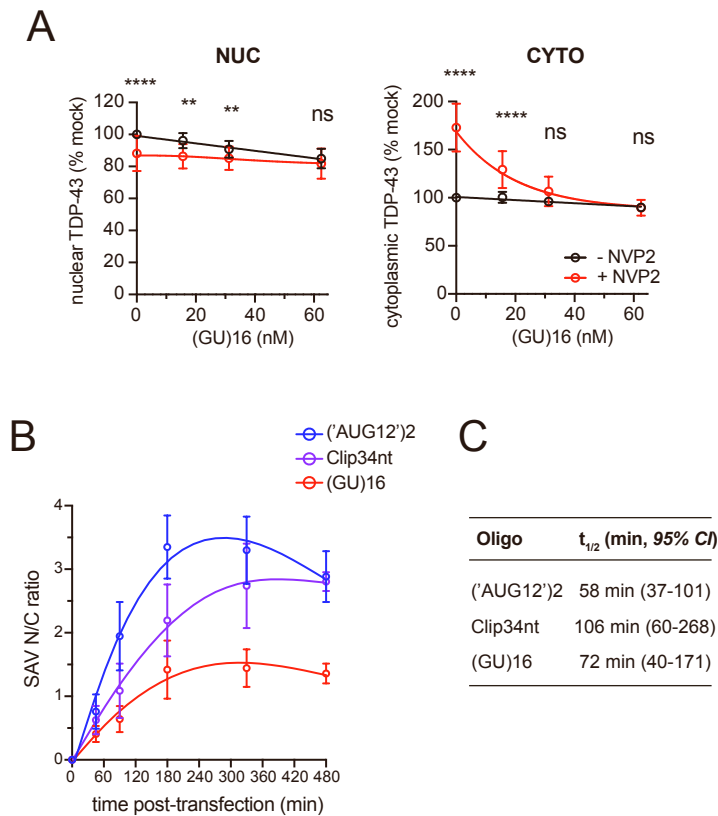

**Figure S2. Extended analysis, GU-oligo-induced nuclear TDP-43 retention, related to figure 3.** **A.** Nuclear and cytoplasmic intensity in (GU)16-transfected cells (% mock-transfected cells), with or without NVP2 treatment. These are the source data used to calculate the N/C ratios in fig 3C. Mean  $\pm$  SD of  $n=15$  biological replicates. NS= not significant, \*\* $p<0.01$ , \*\*\*\* $p<0.0001$  by 2-way ANOVA with Tukey's post-hoc test. **B.** SAV647 nuclear intensity in oligo-transfected cells during the NVP2 recovery assay in fig 3H-I. Mean  $\pm$  SD of  $n=3$  biological replicates. **C.**  $t_{1/2}$  (min) for nuclear uptake calculated from (B) by non-linear regression. 95% CI is shown.

# Figure S3

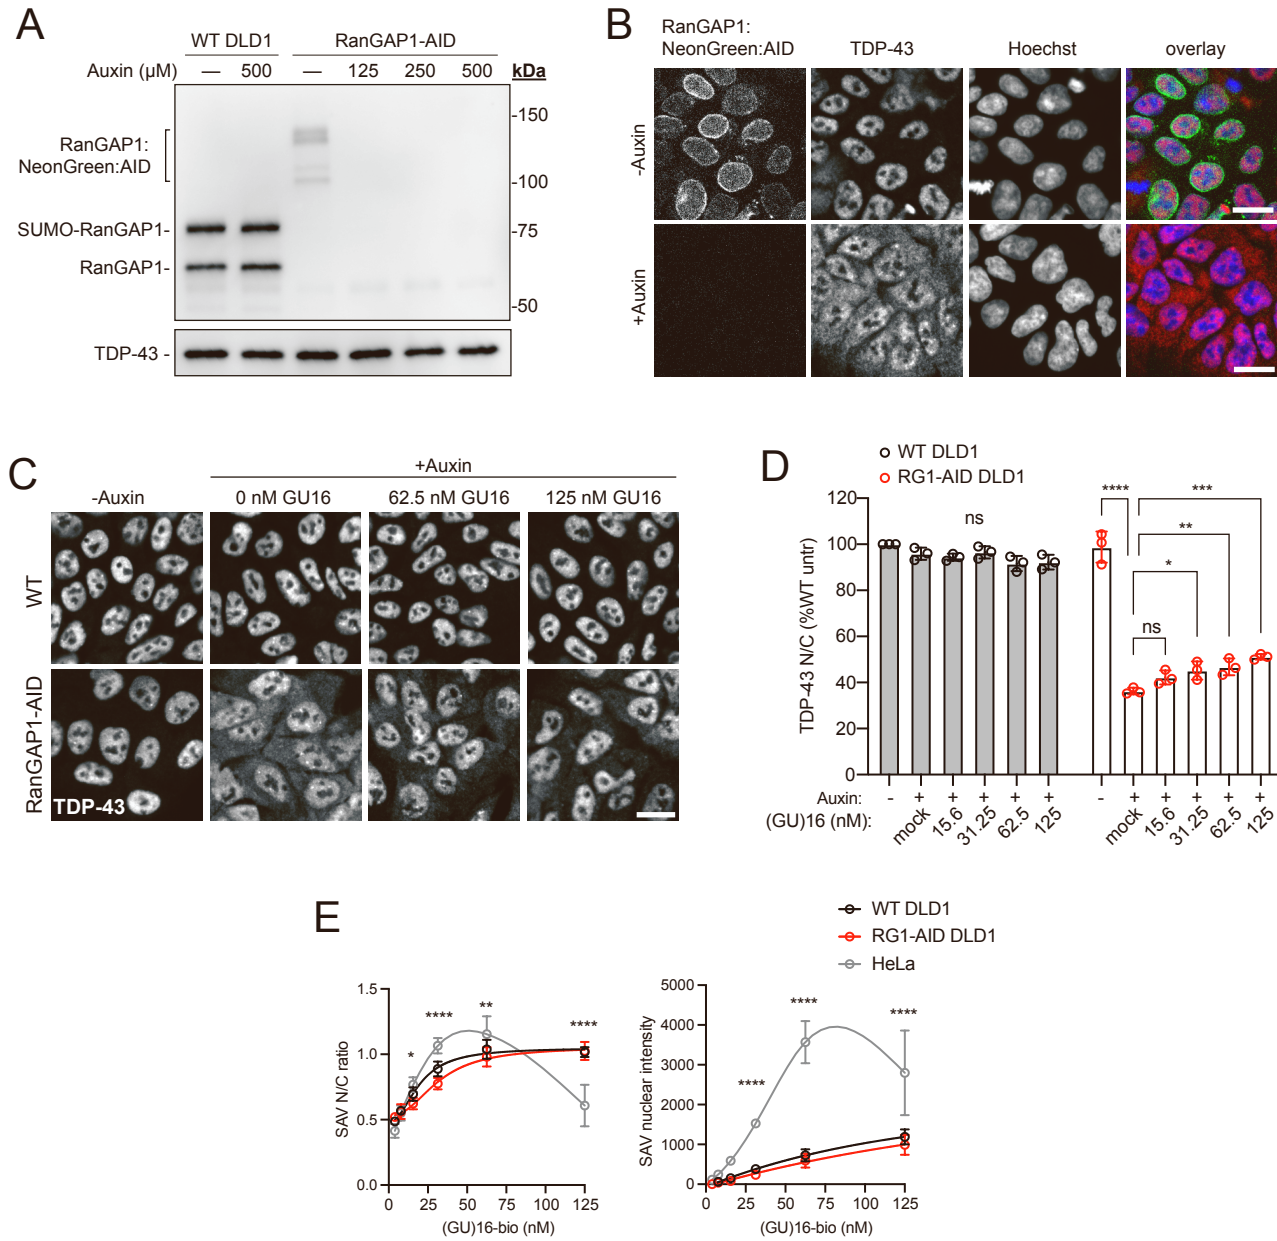

**Figure S3. (GU)16 attenuates TDP-43 mislocalization in RanGAP1-auxin inducible degron (AID) cells, related to figure 3. A.** RanGAP1 immunoblot in wild-type (WT) and RanGAP1-AID cells  $\pm$  2 h auxin (indoleacetic acid) treatment. Distinct bands were seen as expected for RanGAP1 and SUMOylated RanGAP1. Note: the RanGAP1 AID cell line has reduced RanGAP1 expression (bracket) suggesting accelerated RanGAP1 turnover independent of auxin (perhaps due to excess TIR1). TDP-43 expression is unchanged. **B.** Loss of RanGAP1:NeonGreen:AID epifluorescence in RanGAP1 AID cells after 2 h 500  $\mu$ M auxin treatment is accompanied by cytoplasmic mislocalization of TDP-43 (immunostained with AF568-labeled secondary). Scale bar = 20  $\mu$ m. **C.** TDP-43 immunostaining in WT versus RanGAP1 AID cells transfected with increasing concentrations of (GU)16 for 5 h followed by 2 h 500  $\mu$ M auxin treatment. Scale bar = 20  $\mu$ m. **D.** TDP-43 N/C expressed as %WT untreated cells. Mean  $\pm$  SD from n=3 biological replicates. NS= not significant, \*p<0.05, \*\*p<0.01, \*\*\*\*p<0.0001 by 2-way ANOVA with Tukey's post-hoc test. **E.** SAV647 N/C ratio (left) and nuclear intensity (right) in biotinylated (GU)16-transfected DLD1 vs. HeLa cells under optimized conditions for each cell type. Mean  $\pm$  SD for  $\geq$  3 biological replicates. \*p<0.05, \*\*p<0.01, \*\*\*\*p<0.001 by 2-way ANOVA with Tukey's post-hoc test (all groups were compared; asterisks are shown for HeLa vs. RG1-AID comparisons only).



# Figure S4

**A**

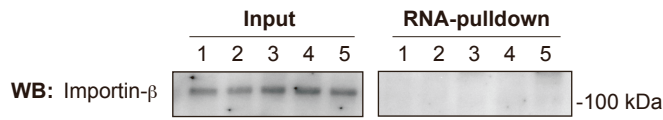

- 1.(CA)16-bio
- 2.(GU)6-bio
- 3.(GU)16-bio
- 4.Clip34nt-bio
- 5.(‘AUG12’)2-bio

**B**

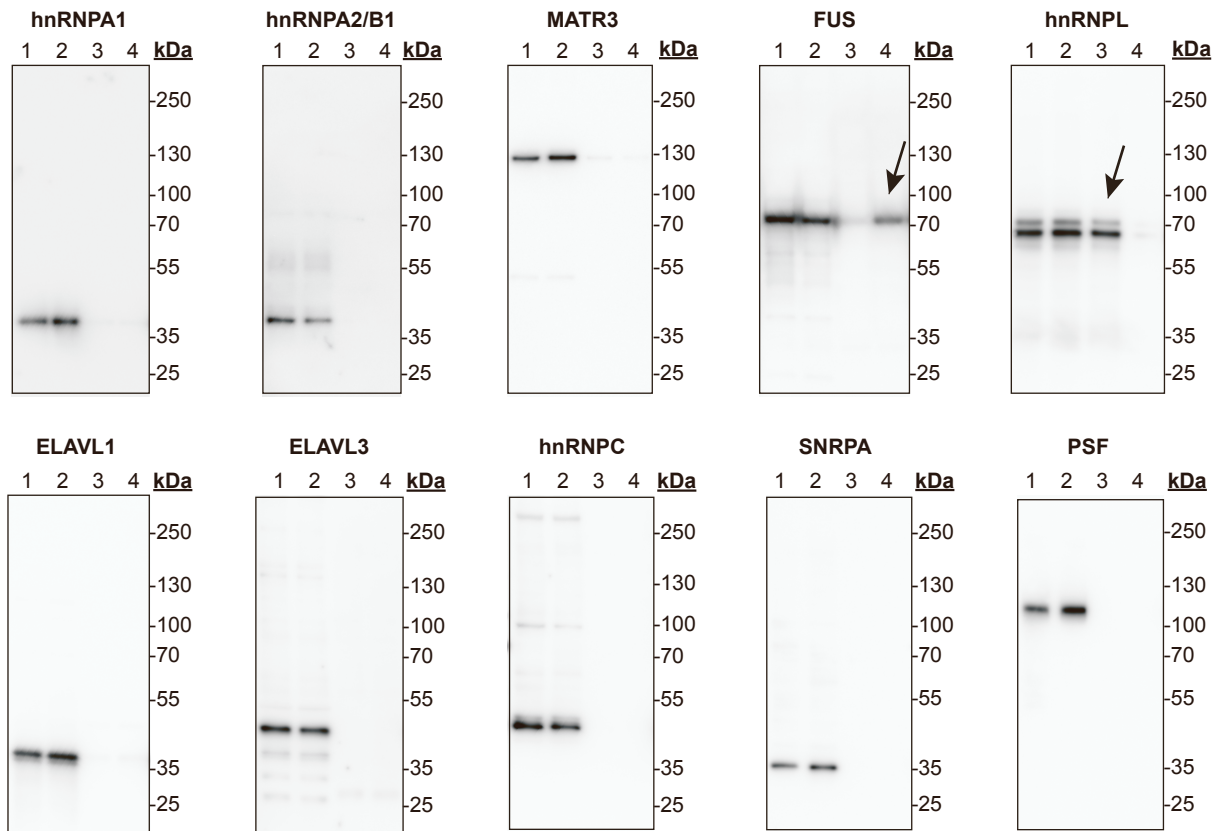

1. Input - (CA)16-bio
2. Input - (GU)16-bio
3. Pulldown - (CA)16-bio
4. Pulldown - (GU)16-bio

**Figure S4. SAV-RNA pulldowns probed for additional binding partners, related to figure 4.** SAV-RNA pulldowns from biotinylated oligo-transfected cells (62.5 nM, 5 h) that were UV crosslinked before lysis and probed with the indicated antibodies, to importin  $\beta$  (**A**), or a panel of nuclear RNA binding proteins (**B**). Note: the blot in A is a reprobe of the blot in fig 4a. Arrows in B indicate FUS binding to (GU)16 and hnRNPL binding to (CA)16.

# Figure S5

Fig 1b

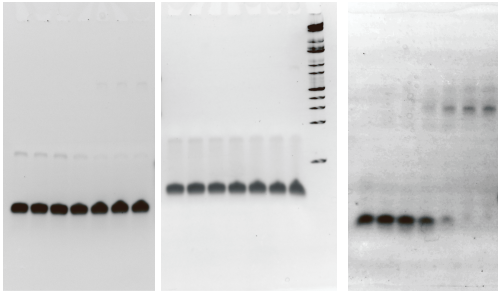

Fig 1d

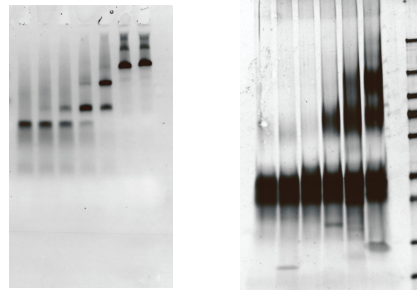

Fig 4a

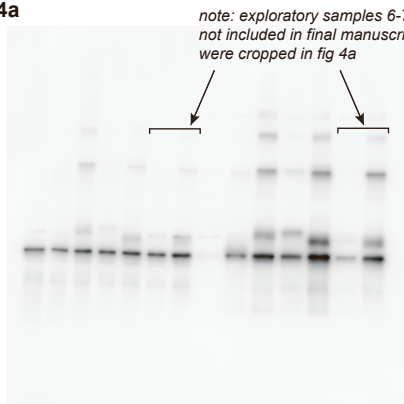

Fig 5e

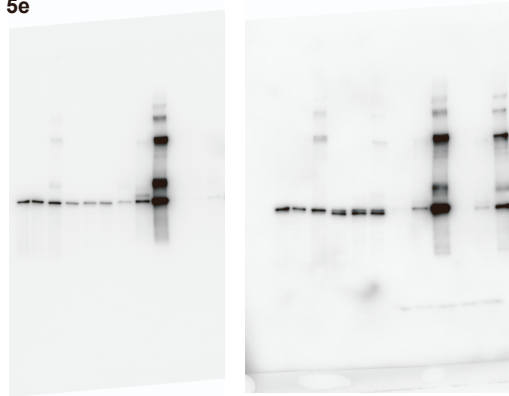

Fig 6a

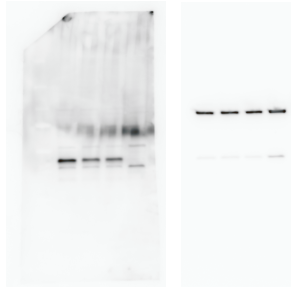

Fig 6b

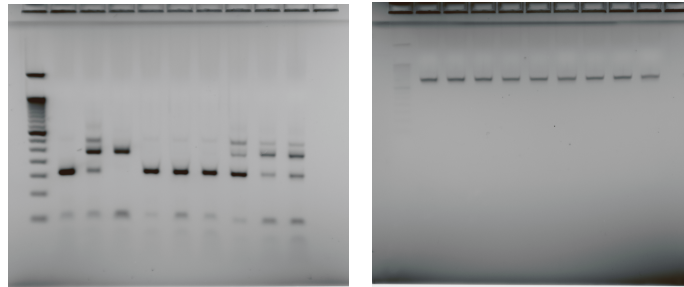

Figure S5. Unmodified gel images, related to figures 1, 4, 5, and 6.

**SUPPLEMENTAL TABLES**

**Table S1. RNA oligonucleotides**

| Oligo                 | RNA sequence with modifications<br>m: 2' O-methyl<br>*: phosphorothioate bond                                         | ID #               |
|-----------------------|-----------------------------------------------------------------------------------------------------------------------|--------------------|
| GU6-biotin            | 5'-mG*mU*mG* mU*mG*mU*mG*mU*mG* mU*mG*rU/3Bio/-3'                                                                     | R78                |
| GU16-biotin           | 5'-mG*mU*mG*mU*mG*mU*mG*mU*mG* mU*mG*mU*mG*mU*mG* mU*mG*mU*<br>mG*mU*mG*mU*mG*mU*mG*mU*mG*mU*mG*rU/3Bio/-3'           | R81, R102,<br>R105 |
| CA6-biotin            | 5'-mC*mA*mC*mA*mC*mA*mC*mA*mC*rA/3Bio/-3'                                                                             | R75                |
| CA16-biotin           | 5'-mC*mA*mC*mA*mC*mA*mC*mA*mC*mA*mC*mA*mC*mA*mC*mA*mC*mA*<br>mC*mA*mC*mA*mC*mA*mC*mA*mC*mA*mC*rA/3Bio/-3'             | R83, R107          |
| ('AUG12')2-<br>biotin | 5'-mG*mU*mG*mU*mG*mA*mA*mU*mG*mA*mA*mU*mG*mU*mG*<br>mU*mG*mA*mA*mU*mG*mA*mA*rU/3Bio/-3'                               | R95                |
| Clip34nt -<br>biotin  | 5'-mG*mA*mG*mA*mG*mA*mG*mC*mG*mC*mG*mU*mG*mC*mA*mG*mA*mG*<br>mA*mC*mU*mU*mG*mG*mU*mG*mG*mU*mG*mC*mA*mU*mA*rA/3Bio/-3' | R76, R103          |
| A12-biotin            | 5'-mA*mA*mA*mA*mA*mA*mA*mA*mA*mA*rA/3Bio/-3'                                                                          | R74                |
| A32-biotin            | 5'-mA*mA*mA*mA*mA*mA*mA*mA*mA*mA*mA*mA*mA*mA*mA*mA*mA*<br>mA*mA*mA*mA*mA*mA*mA*mA*mA*rA/3Bio/-3'                      | R96                |

**Table S2. Primers**

| Target                   | Sequence                                                                                           | Source or catalog #                  |
|--------------------------|----------------------------------------------------------------------------------------------------|--------------------------------------|
| RT-PCR                   |                                                                                                    |                                      |
| EPB41L4A-F               | GGACCTCCATATACTTTGTATTTTGGT                                                                        | Tan <i>et al.</i> , 2016             |
| EPB41L4A-R               | AGCTGAGCAGCAGTGTTGAC                                                                               | Tan <i>et al.</i> , 2016             |
| GAPDH-F                  | ACCACAGTCCATGCCATCAC                                                                               | IDT                                  |
| GAPDH-R                  | TCCACCACCCTGTTGCTGTA                                                                               | IDT                                  |
| qRT-PCR                  |                                                                                                    |                                      |
| EPB41L4A<br>cryptic exon | F - ACATATGCACACACACTCTCACA<br>Probe – CACTTCAGCCTGTCCCTTT (FAM)<br>R - AGTCACCTTACAAAACAGAAGTCACA | ThermoFisher<br>custom assay APRWNHN |
| ARHGAP32<br>cryptic exon | F - CAGCCAAATGCACAGCGAAT<br>Probe – AATGACCCAGTCAAATA (FAM)<br>R - GGAGGAAGCATTGAGGTTTCTA          | ThermoFisher<br>custom assay APT2G3K |
